# Supplementary material
Source: MDPI journal article supplement (https://www.mdpi.com/2072-4292/15/18/4406)
Supplement: s1 [file s1]

**Table S1.** Confusion matrix for the testing dataset using our proposed TCNet.

| Predicted<br>Class | Ground Truth |           |         |         |          | Precision: |
|--------------------|--------------|-----------|---------|---------|----------|------------|
|                    | Sea Area     | Land Area | RCA     | CCA     | Sum      |            |
| Sea Area           | 38165752     | 221167    | 256479  | 23888   | 38667286 | 0.99       |
| Land Area          | 304240       | 34867853  | 15698   | 1488    | 35189279 | 0.99       |
| RCA                | 413943       | 23644     | 5103005 | 202     | 5540794  | 0.92       |
| CCA                | 40703        | 631       | 0       | 1039515 | 1080849  | 0.96       |
| Sum                | 38924638     | 35113295  | 5375182 | 1065093 |          |            |
| Recall:            | 0.98         | 0.99      | 0.95    | 0.98    |          |            |
| F1:                | 0.98         | 0.99      | 0.93    | 0.97    |          |            |
| IoU:               | 0.97         | 0.98      | 0.88    | 0.94    |          |            |

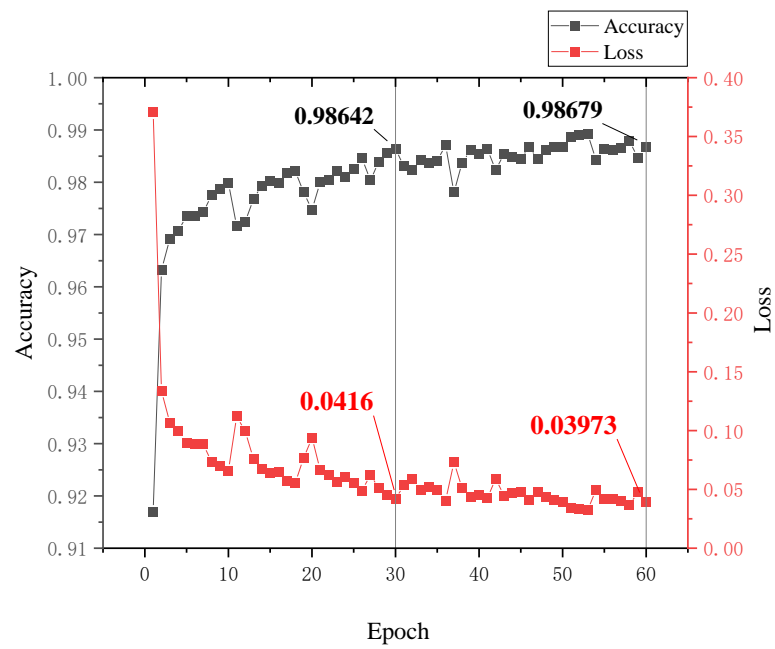

**Figure S1.** Loss and accuracy curves of TCNet for the training process.
